# Supplementary material
Source: publisher site journal article supplement (http://www.spandidos-publications.com/3948/downloadSupplementary)
Supplement: Supplementary file 1 [file downloadSupplementary]

## Sheet: Sheet1
Table SI. The sequences of universal PCR primers and PCR index.
Sample	universal PCR primers	PCR index
FT1	TCTTTCCC	CATTGCTT
FT2	TCTTTCCC	GCTCCTGT
FTC1	TCTTTCCC	TTCAAGGT
FTC2	TCTTTCCC	AAGTCTCT
FTC3	TCTTTCCC	AGAGATCT
FTC4	TCTTTCCC	CATTGCTT
OV1	TCTTTCCC	GCTCCTGT
OV2	TCTTTCCC	TTCAAGGT
OVC1	TCTTTCCC	AAGTCTCT
OVC2	TCTTTCCC	AGAGATCT
OVC3	TCTTTCCC	CATTGCTT
OVC4	TCTTTCCC	GCTCCTGT
